# Supplementary material
Source: HighWire-hosted journal article supplement (https://bmjopenrespres.bmj.com/content/8/1/e000877)
Supplement: inline-supplementary-material-3 [file inline-supplementary-material-3.xlsx]

## Sheet: Supp. 1_V0.1
PATIENT-REPORTED OUTCOMES IDENTIFIED IN THE LITERATURE & DURING CONSUMER WORKSHOPS
General symptoms
Sleep quality
Difficulty sleeping
Sleepiness/tired
Fatigue/lack of energy/deconditioned
Appetite
Nausea/vomiting
Exercise tolerance/capacity
Vitals (HR, RR, O2 sat, BP)
Pain- physical
Emotional distress/anxiety/worry
Activity level
Weight
Nausea/vomiting
Pain
Weakness/deconditioning
Sweating
Deconditioning
Chills/sweats
Headache
Tiredness
Fever
Feeling well
General health status
Exercise capacity/tolerance
Respiratory-related
Cough (productive/non-productive)
Cough without bracing
Wheeze
Shortness of breath/dysnoea (difficulty breathing)
Rattly chest
Haemoptysis (coughing up blood)
Cough frequency
Sputum production
Inability to clear/cough up sputum
Chest tightness
Cough waking at night
Gastrointestinal-related
Abdominal pain
Stool frequency
Flatulence
Constipation
Faeacal incontinence
Distal ileal obstruction syndrome
Steatorrhoea
Diarrhoea/frequent bowel movements
Bloating
Pain in the bottom
Stool urgency
Nutrition
Weight
Height
Body-mass-index
Appetite
Intake
Mental health
Anxiety/worry/stress- general
Anxiety/worry/stress- disease-specific
Mood
Depression/SADNESS
Grief/loss (of friends/other known patients)
Emotional well-being/regulation
Feeling 'normal'
Frustration
Self-acceptance/esteem
Irritability/crankiness
Feeling useless
Poor concentration
Poor cognition/ability to problem solve/executive functioning
Needle phobia
Reproductive health
Sexual functioning
Fertility
Menopause/andropause
Amenorrhoea
Puberty
Genitourinary
Urinary incontinence
Urinary prolapse
Renal stones
Ear nose and throat
Sinus infections
Sinus congestion
Sinus-related pain
Loss of smell/taste
Quality of Life (QoL)
General QoL
Disease-related
Grief/loss
Functional outcomes (daily activities)
Impact on daily activities
Impact on physical activities/ability to play
Treatment burden
Adherence
Hospitalisation
Financial stress/earning capacity
Social functioning
Relationships with friends, family
Intimate relations
Inability to meet personal/school/work goals (productivity)
Inability to attend school/work/daycare
Staying at home/'missing out' on social activities
Social isolation
Impact on parenting non-CF children
Employment (school/work attendance)
Visibility to the public/stay at home more than you want to
Self-acceptance
Time spent sitting/lying down
Normality
Costs to individual (e.g. of care, including treatments, therapy, employment)
Flexibility of treatments
Autonomy
Peer supports
Trauma
Carer well-being
Carer guilt (e.g. inability to provide desired level of care for other siblings)
Other complications of disease
Unknown long-term effects of therapy
Exocrine pancreatic function
PERT independent fat malabsorption
Pancreatitis
Osteoporosis/reduced bone density
Diabetes
Malignancy (E.g. colorectal)
Need for semi-permanent/permanent vascular access device
Therapy-related side-effects
AMR. Development of AMR & acquisition of resistant strains, eradication of pathogens
Hearing loss
Renal impairment
Liver dysfunction
Abdominal pain
Abdominal distention
C. difficile colitis
Constipation
Cough/increased cough
Decreased appetite
Diarrhoea
DIOS
Fever
Nasal congestion/stuffy nose
Poor growth
Pulmonary congestion/chest congestion
Rectal prolapse
Vomiting/emesis/nausea
Anaphylaxis
Rash
Drug allergy
Hoarseness
Moodiness
Depression
Gastrointestinal symptoms: bloating, loose stools, abdominal pain
Damage to vital organs
Visual problems. E.g. cataracts due to ORKAMBI
Photosensitivity
Steroid-related side-effects (Hypertension, glucose intolerance, friable skin)
Thrush
